# Supplementary material for: Synthesis and electrical properties of novel oligothiophenes partially containing 3,4-ethylenedioxythiophenes
Source: Royal Society of Chemistry journal article supplement (doi:10.1039/c3ra44129f), 2013-10-29
Supplement: c3ra44129f.pdf [file c3ra44129f.pdf]

*Supporting Information*

**Synthesis and Electrical Properties of Novel Oligothiophenes  
Partially Containing 3,4-Ethylenedioxythiophenes**

Ichiro Imae,\* Saki Imabayashi, Kenji Komaguchi,  
Zhifang Tan, Yousuke Ooyama and Yutaka Harima\*

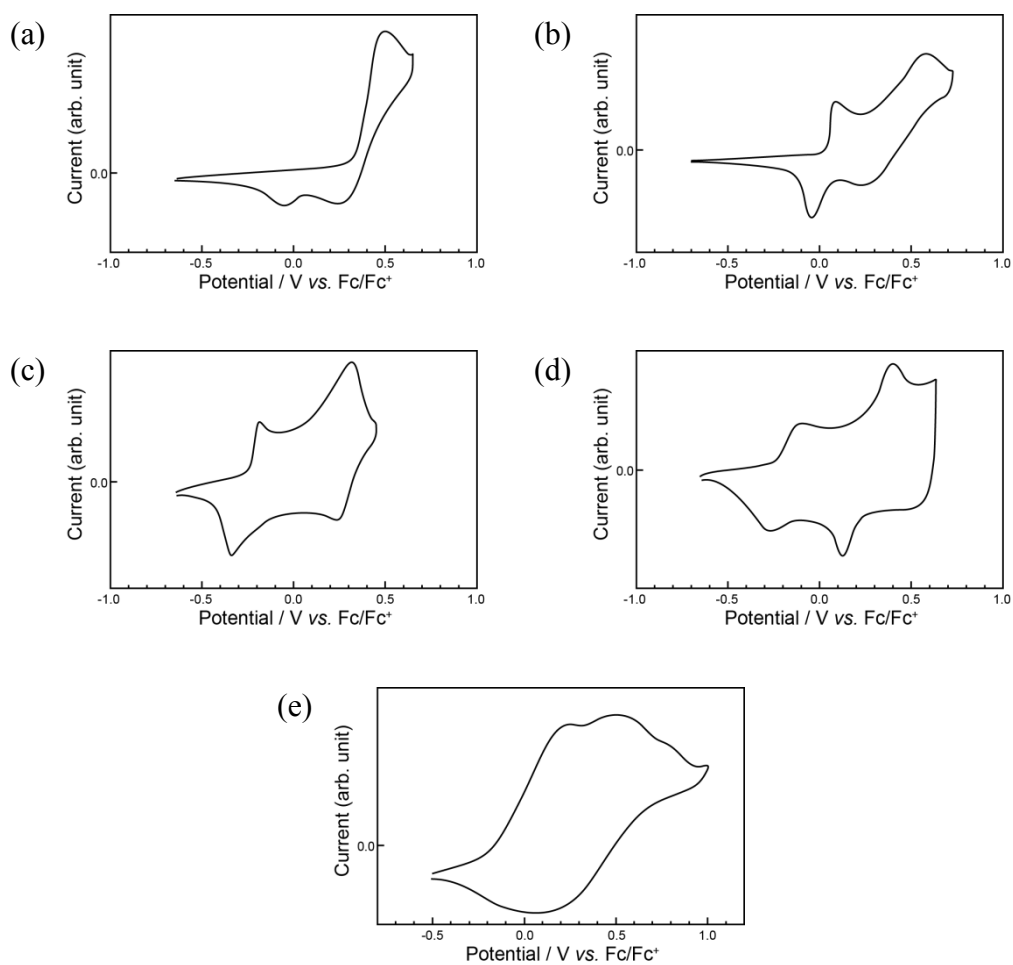

**Fig. 1S.** Cyclic voltammograms of **E<sub>n</sub>Ts** in dichloromethane solution. (a) **E<sub>3</sub>T**, (b) **E<sub>6</sub>T**, (c) **E<sub>7</sub>T**, (d) **E<sub>9</sub>T** and (e) **E<sub>11</sub>T**. Scan rate: 50 mV s<sup>-1</sup>. Electrolyte: Bu<sub>4</sub>NClO<sub>4</sub> (0.1 M).
